# Supplementary material for: Computational modelling of bovine ovarian follicle development
Source: Springer Nature journal article supplement (doi:10.1186/1752-0509-7-60), 2013-01-01

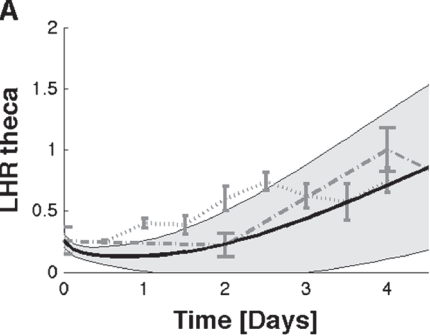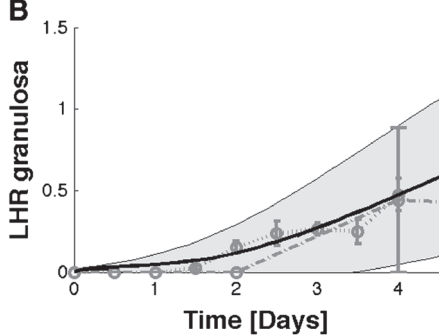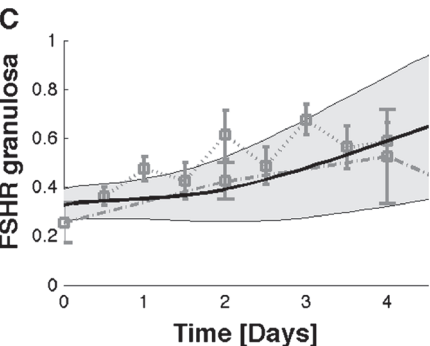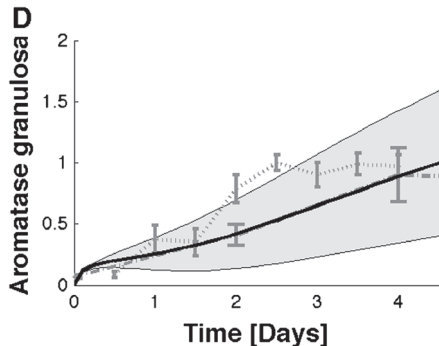

Supplement: 12918_2012_1114_MOESM7_ESM.pdf [file 12918_2012_1114_MOESM7_ESM.pdf]
